# Supplementary material for: A-to-I RNA Editing Affects lncRNAs Expression after Heat Shock
Source: MDPI journal article supplement (doi:10.3390/genes9120627), 2018-12-13
Supplement: s1 [file s1]

**Table S1. Enrichment of differentially-expressed genes according to biological process GO term categories**

|                                      | GO term    | Description                                                     | P value  | P adjusted | <sup>1</sup> Enrichment (N, B, n, b) |
|--------------------------------------|------------|-----------------------------------------------------------------|----------|------------|--------------------------------------|
| DE genes in both N2 and ADAR mutants | GO:0030968 | endoplasmic reticulum unfolded protein response                 | 5.02E-17 | 2.98E-13   | 12.02 (13581,55,411,20)              |
|                                      | GO:0034976 | response to endoplasmic reticulum stress                        | 6.05E-13 | 1.8E-9     | 7.78 (13581,85,411,20)               |
|                                      | GO:0006950 | response to stress                                              | 3.84E-7  | 7.61E-4    | 2.06 (13581,850,411,53)              |
|                                      | GO:0030198 | extracellular matrix organization                               | 1.35E-6  | 2.01E-3    | 6.88 (13581,48,411,10)               |
|                                      | GO:0043062 | extracellular structure organization                            | 1.65E-6  | 1.96E-3    | 6.74 (13581,49,411,10)               |
| DE genes which are specific to N2    | GO:0003824 | catalytic activity                                              | 1.88E-19 | 4.76E-16   | 1.51 (13581,4033,756,338)            |
|                                      | GO:0032559 | adenyl ribonucleotide binding                                   | 3.42E-19 | 4.32E-16   | 2.35 (13581,909,756,119)             |
|                                      | GO:0030554 | adenyl nucleotide binding                                       | 4.46E-19 | 3.77E-16   | 2.34 (13581,912,756,119)             |
|                                      | GO:0043168 | anion binding                                                   | 8.36E-19 | 5.29E-16   | 2.04 (13581,1367,756,155)            |
|                                      | GO:0005524 | ATP binding                                                     | 2.29E-18 | 1.16E-15   | 2.33 (13581,895,756,116)             |
|                                      | GO:0032555 | purine ribonucleotide binding                                   | 3.54E-18 | 1.49E-15   | 2.16 (13581,1107,756,133)            |
|                                      | GO:0017076 | purine nucleotide binding                                       | 4.82E-18 | 1.74E-15   | 2.15 (13581,1111,756,133)            |
|                                      | GO:0032553 | ribonucleotide binding                                          | 1.11E-17 | 3.52E-15   | 2.13 (13581,1122,756,133)            |
|                                      | GO:0035639 | purine ribonucleoside triphosphate binding                      | 1.16E-17 | 3.25E-15   | 2.15 (13581,1085,756,130)            |
|                                      | GO:1901265 | nucleoside phosphate binding                                    | 2.79E-17 | 7.06E-15   | 2.04 (13581,1249,756,142)            |
|                                      | GO:0000166 | nucleotide binding                                              | 2.79E-17 | 6.42E-15   | 2.04 (13581,1249,756,142)            |
|                                      | GO:0097367 | carbohydrate derivative binding                                 | 1.1E-15  | 2.31E-13   | 2.01 (13581,1186,756,133)            |
|                                      | GO:0036094 | small molecule binding                                          | 1.1E-15  | 2.14E-13   | 1.92 (13581,1383,756,148)            |
|                                      | GO:0008144 | drug binding                                                    | 2.07E-14 | 3.75E-12   | 2.04 (13581,1049,756,119)            |
|                                      | GO:0140096 | catalytic activity, acting on a protein                         | 7.64E-14 | 1.29E-11   | 1.86 (13581,1359,756,141)            |
|                                      | GO:0016773 | phosphotransferase activity, alcohol group as acceptor          | 3.23E-12 | 5.12E-10   | 2.43 (13581,518,756,70)              |
|                                      | GO:0004672 | protein kinase activity                                         | 5.47E-12 | 8.15E-10   | 2.52 (13581,456,756,64)              |
|                                      | GO:0016301 | kinase activity                                                 | 1.51E-11 | 2.12E-9    | 2.28 (13581,582,756,74)              |
|                                      | GO:0016772 | transferase activity, transferring phosphorus-containing groups | 1.52E-9  | 2.03E-7    | 2.02 (13581,693,756,78)              |
|                                      | GO:0004715 | non-membrane spanning protein tyrosine kinase activity          | 2.15E-9  | 2.72E-7    | 6.12 (13581,47,756,16)               |
|                                      | GO:0004721 | phosphoprotein phosphatase activity                             | 8.29E-9  | 9.99E-7    | 3.18 (13581,175,756,31)              |
|                                      | GO:0043167 | ion binding                                                     | 8.62E-9  | 9.91E-7    | 1.42 (13581,2741,756,216)            |
|                                      | GO:0004725 | protein tyrosine phosphatase activity                           | 1.82E-8  | 2E-6       | 3.99 (13581,99,756,22)               |
|                                      | GO:0016787 | hydrolase activity                                              | 2.72E-8  | 2.87E-6    | 1.55 (13581,1654,756,143)            |
|                                      | GO:0016791 | phosphatase activity                                            | 1.5E-7   | 1.52E-5    | 2.67 (13581,229,756,34)              |
|                                      | GO:0016740 | transferase activity                                            | 3.82E-7  | 3.72E-5    | 1.51 (13581,1621,756,136)            |
|                                      | GO:0042578 | phosphoric ester hydrolase activity                             | 2.4E-6   | 2.25E-4    | 2.34 (13581,269,756,35)              |
|                                      | GO:0016788 | hydrolase activity, acting on ester bonds                       | 3.77E-6  | 3.41E-4    | 1.92 (13581,497,756,53)              |
|                                      | GO:1901363 | heterocyclic compound binding                                   | 6.18E-6  | 5.39E-4    | 1.30 (13581,3011,756,218)            |
|                                      | GO:0097159 | organic cyclic compound binding                                 | 8.02E-6  | 6.76E-4    | 1.30 (13581,3022,756,218)            |
|                                      | GO:0004713 | protein tyrosine kinase activity                                | 1.09E-5  | 8.89E-4    | 3.32 (13581,92,756,17)               |

<sup>1</sup>N, total number of genes; B; total number of genes associated with a specific GO term; n, number of differentially expressed genes;

b, number of genes in the intersection; Enrichment, (b/n) / (B/N).

**Table S2. Enrichment of differentially-expressed genes according to molecular function GO term categories**

|                                            | GO term    | Description                                                     | P value  | P adjusted | <sup>1</sup> Enrichment (N, B, n, b) |
|--------------------------------------------|------------|-----------------------------------------------------------------|----------|------------|--------------------------------------|
| DE genes in both N2 and ADAR mutants       | GO:0042302 | structural constituent of cuticle                               | 3.01E-36 | 7.62E-33   | 9.89 (13581,167,411,50)              |
|                                            | GO:0005198 | structural molecule activity                                    | 8.43E-21 | 1.07E-17   | 4.31 (13581,429,411,56)              |
|                                            | GO:0005201 | extracellular matrix structural constituent                     | 2.8E-7   | 2.36E-4    | 8.06 (13581,41,411,10)               |
|                                            | GO:0004222 | metalloendopeptidase activity                                   | 9.63E-6  | 6.09E-3    | 4.30 (13581,100,411,13)              |
| DE genes which are specific to N2          | GO:0003824 | catalytic activity                                              | 1.88E-19 | 4.76E-16   | 1.51 (13581,4033,756,338)            |
|                                            | GO:0032559 | adenyl ribonucleotide binding                                   | 3.42E-19 | 4.32E-16   | 2.35 (13581,909,756,119)             |
|                                            | GO:0030554 | adenyl nucleotide binding                                       | 4.46E-19 | 3.77E-16   | 2.34 (13581,912,756,119)             |
|                                            | GO:0043168 | anion binding                                                   | 8.36E-19 | 5.29E-16   | 2.04 (13581,1367,756,155)            |
|                                            | GO:0005524 | ATP binding                                                     | 2.29E-18 | 1.16E-15   | 2.33 (13581,895,756,116)             |
|                                            | GO:0032555 | purine ribonucleotide binding                                   | 3.54E-18 | 1.49E-15   | 2.16 (13581,1107,756,133)            |
|                                            | GO:0017076 | purine nucleotide binding                                       | 4.82E-18 | 1.74E-15   | 2.15 (13581,1111,756,133)            |
|                                            | GO:0032553 | ribonucleotide binding                                          | 1.11E-17 | 3.52E-15   | 2.13 (13581,1122,756,133)            |
|                                            | GO:0035639 | purine ribonucleoside triphosphate binding                      | 1.16E-17 | 3.25E-15   | 2.15 (13581,1085,756,130)            |
|                                            | GO:1901265 | nucleoside phosphate binding                                    | 2.79E-17 | 7.06E-15   | 2.04 (13581,1249,756,142)            |
|                                            | GO:0000166 | nucleotide binding                                              | 2.79E-17 | 6.42E-15   | 2.04 (13581,1249,756,142)            |
|                                            | GO:0097367 | carbohydrate derivative binding                                 | 1.1E-15  | 2.31E-13   | 2.01 (13581,1186,756,133)            |
|                                            | GO:0036094 | small molecule binding                                          | 1.1E-15  | 2.14E-13   | 1.92 (13581,1383,756,148)            |
|                                            | GO:0008144 | drug binding                                                    | 2.07E-14 | 3.75E-12   | 2.04 (13581,1049,756,119)            |
|                                            | GO:0140096 | catalytic activity, acting on a protein                         | 7.64E-14 | 1.29E-11   | 1.86 (13581,1359,756,141)            |
|                                            | GO:0016773 | phosphotransferase activity, alcohol group as acceptor          | 3.23E-12 | 5.12E-10   | 2.43 (13581,518,756,70)              |
|                                            | GO:0004672 | protein kinase activity                                         | 5.47E-12 | 8.15E-10   | 2.52 (13581,456,756,64)              |
|                                            | GO:0016301 | kinase activity                                                 | 1.51E-11 | 2.12E-9    | 2.28 (13581,582,756,74)              |
|                                            | GO:0016772 | transferase activity, transferring phosphorus-containing groups | 1.52E-9  | 2.03E-7    | 2.02 (13581,693,756,78)              |
|                                            | GO:0004715 | non-membrane spanning protein tyrosine kinase activity          | 2.15E-9  | 2.72E-7    | 6.12 (13581,47,756,16)               |
|                                            | GO:0004721 | phosphoprotein phosphatase activity                             | 8.29E-9  | 9.99E-7    | 3.18 (13581,175,756,31)              |
|                                            | GO:0043167 | ion binding                                                     | 8.62E-9  | 9.91E-7    | 1.42 (13581,2741,756,216)            |
|                                            | GO:0004725 | protein tyrosine phosphatase activity                           | 1.82E-8  | 2E-6       | 3.99 (13581,99,756,22)               |
|                                            | GO:0016787 | hydrolase activity                                              | 2.72E-8  | 2.87E-6    | 1.55 (13581,1654,756,143)            |
|                                            | GO:0016791 | phosphatase activity                                            | 1.5E-7   | 1.52E-5    | 2.67 (13581,229,756,34)              |
|                                            | GO:0016740 | transferase activity                                            | 3.82E-7  | 3.72E-5    | 1.51 (13581,1621,756,136)            |
|                                            | GO:0042578 | phosphoric ester hydrolase activity                             | 2.4E-6   | 2.25E-4    | 2.34 (13581,269,756,35)              |
|                                            | GO:0016788 | hydrolase activity, acting on ester bonds                       | 3.77E-6  | 3.41E-4    | 1.92 (13581,497,756,53)              |
|                                            | GO:1901363 | heterocyclic compound binding                                   | 6.18E-6  | 5.39E-4    | 1.30 (13581,3011,756,218)            |
|                                            | GO:0097159 | organic cyclic compound binding                                 | 8.02E-6  | 6.76E-4    | 1.30 (13581,3022,756,218)            |
|                                            | GO:0004713 | protein tyrosine kinase activity                                | 1.09E-5  | 8.89E-4    | 3.32 (13581,92,756,17)               |
| DE genes which are specific to ADAR mutant | GO:0098772 | molecular function regulator                                    | 2.98E-6  | 7.56E-3    | 2.04 (13581,396,772,46)              |
|                                            | GO:0004867 | serine-type endopeptidase inhibitor activity                    | 5.28E-6  | 6.68E-3    | 4.69 (13581,45,772,12)               |
|                                            | GO:0004866 | endopeptidase inhibitor activity                                | 1.39E-5  | 8.82E-3    | 4.01 (13581,57,772,13)               |

<sup>1</sup>N, total number of genes; B; total number of genes associated with a specific GO term; n, number of differentially expressed genes; b, number of genes in the intersection; Enrichment, (b/n) / (B/N).
